# Supplementary material for: Genetic and Pomological Determination of the Trueness-to-Type of Sweet Cherry Cultivars in the German National Fruit Genebank
Source: MDPI journal article supplement (doi:10.3390/plants12010205), 2023-01-03
Supplement: s1 [file s1]

## Cluster I

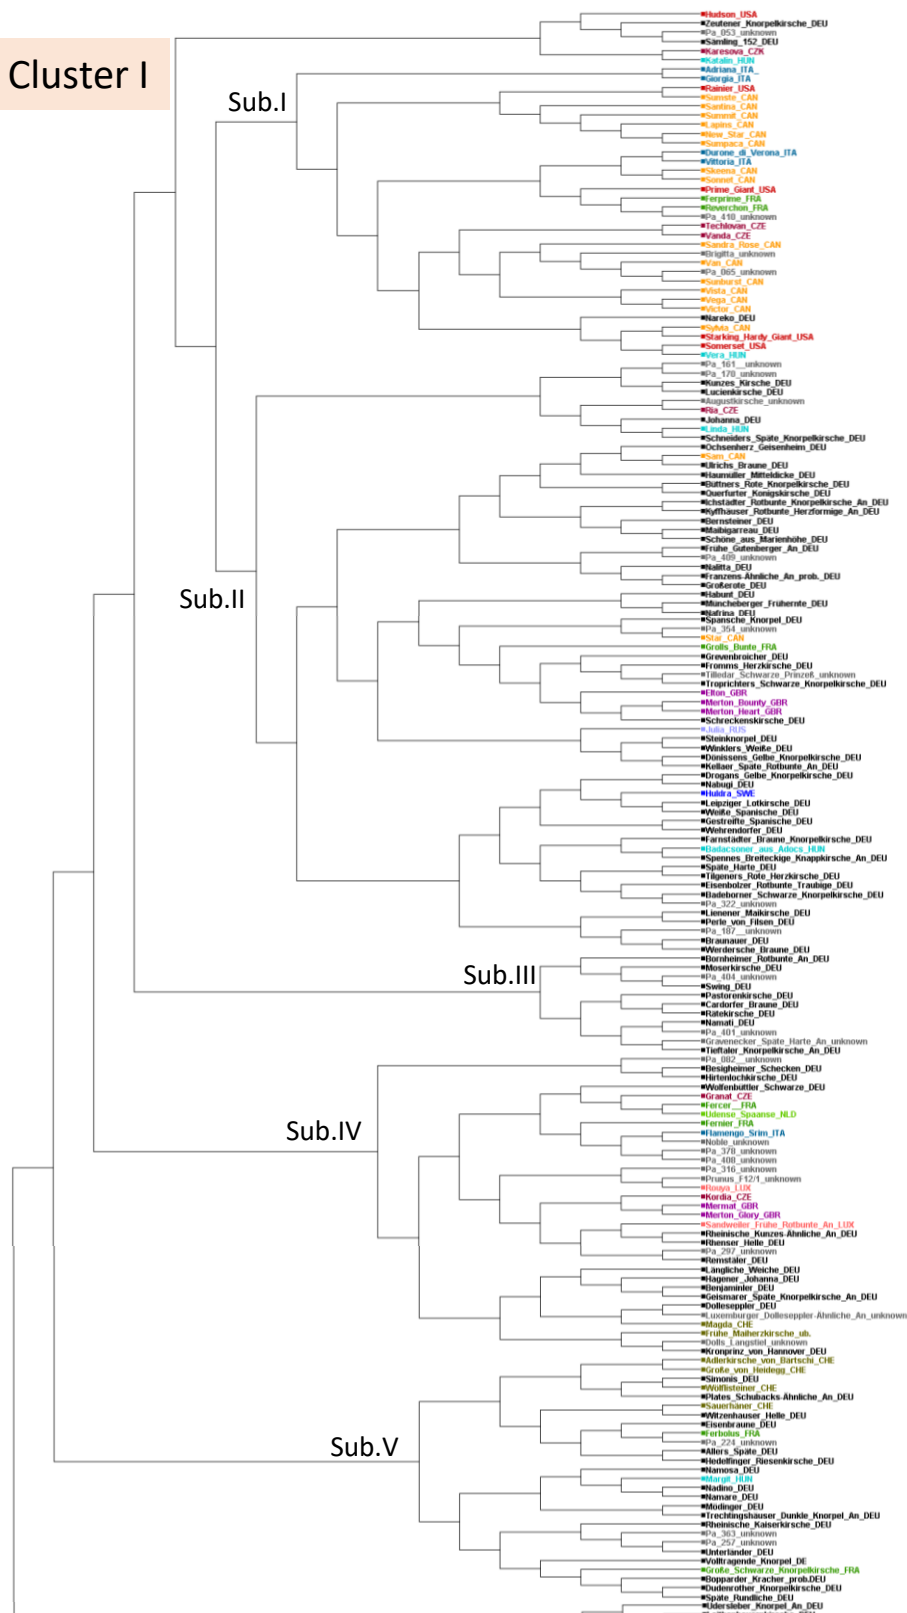

Foreign cultivars,  
mainly from Canada

Mainly German  
cultivars, from Middle  
East and East  
Germany

Foreign European  
cultivars and cultivars  
from North, West and  
South Germany

## Cluster II

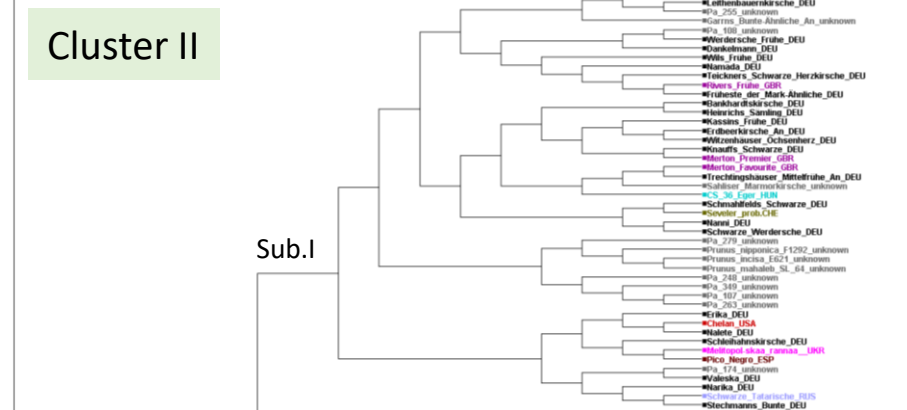

German cultivars  
(middle-eastern), wild  
species, cultivars from  
Great Britain and  
Eastern Europe

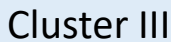

German cultivars  
mainly from the  
North (Altes Land),  
South and West  
Germany

French cultivars and  
cultivars from  
Dresden-Pillnitz,  
Germany

Foreign cultivars  
mainly from USA and  
Great Britain,  
German cultivars
