# Supplementary material for: Genetic and Pomological Determination of the Trueness-to-Type of Sweet Cherry Cultivars in the German National Fruit Genebank
Source: MDPI journal article supplement (doi:10.3390/plants12010205), 2023-01-03
Supplement: s1 [file s1]

**Table S1.** SSR markers used for the genetic assessment of the authenticity of Sweet Cherry Cultivars in the German National Fruit Genebank.

| Multiplex | Marker    | Primer      | Primer sequence (5' → 3') | Dye   |
|-----------|-----------|-------------|---------------------------|-------|
| MP1       | BPPCT037  | BPPCT037-F  | CATGGAAGAGGATCAAGTGC      | FAM   |
|           |           | BPPCT037-R  | CTTGAAGGTAGTGCCAAAGC      |       |
|           | CPPCT022  | CPPCT022-F  | CAATTAGCTAGAGAGAATTATTG   | FAM   |
|           |           | CPPCT022-R  | GACAAGAAGCAAGTAGTTTG      |       |
|           | EMPA002   | EMPA002-F   | TGACAGGTCATCATAACCATTTG   | At532 |
|           |           | EMPA002-R   | CAGGATTAAGCATTGCAAATTA    |       |
|           | EMPas06   | EMPas06-F   | AAGCGGAAAGCACAGGTAG       | At532 |
|           |           | EMPas06-R   | TTGCTAGCATAGAAAAGAATTGTAG |       |
|           | EMPA003   | EMPA003-F   | AGCCATTCTGAAAAGGTGGA      | At550 |
|           |           | EMPA003-R   | GCATTCAGCCAACAAAATCA      |       |
| MP2       | EMPas14   | EMPas14-F   | TCCGCCATATCACAATCAAC      | At550 |
|           |           | EMPas14-R   | TTCCACACAAAAACCAATCC      |       |
|           | CPPCT006  | CPPCT006-F  | AATTAActCCAACAGCTCCA      | FAM   |
|           |           | CPPCT006-R  | ATGGTTGCTTAATTCAATGG      |       |
|           | UDP98-412 | UDP98-412-F | AGGGAAAGTTTCTGCTGCAC      | At532 |
|           |           | UDP98-412-R | GCTGAAGACGACGATGATGA      |       |
|           | EMPas01   | EMPas01-F   | CAAAATCAACAAAATCTAAACC    | At532 |
|           |           | EMPas01-R   | CAAGAATCTTCTAGCTCAAACC    |       |
|           | PS05C03   | PS05C03-F   | AGATCTCAAAGAAGCTGA        | At550 |
|           |           | PS05C03-R   | AGCTTATGCATATACCTG        |       |
| MP3       | EMPA002   | EMPA002-F   | TGACAGGTCATCATAACCATTTG   | At565 |
|           |           | EMPA002-R   | CAGGATTAAGCATTGCAAATTA    |       |
|           | EMPas12   | EMPas12-F   | TGTGCTAATGCCAAAAATACC     | FAM   |
|           |           | EMPas12-R   | ACATGCATTTCAACCCACTC      |       |
|           | EMPA017   | EMPA017-F   | ATTTCAATGTGGGGATGAGC      | FAM   |
|           |           | EMPA017-R   | TGAAGTGAGGGAAATGGAGC      |       |
|           | EMPA026   | EMPA026-F   | ATTGAAAAAGCCAAAGAGCG      | At532 |
|           |           | EMPA026-R   | TTCACGGTTTGAAGCAAGTG      |       |
|           | PceGA34   | PceGA34-F   | GAACATGTGGTGTGCTGGTT      | At550 |
|           |           | PceGA34-R   | TCCACTAGGAGGTGCAAATG      |       |
|           | EMPas10   | EMPas10-F   | GCTAATATCAAATCCCAGCTCTC   | At565 |
|           |           | EMPas10-R   | TGAAGAAGTATGGCTTCTGTGG    |       |
